# Supplementary material
Source: PubMed Central journal article supplement (PMC8255543)
Supplement: 00018-2021.SUPPLEMENT.pdf [file 00018-2021.SUPPLEMENT.pdf]

**Supplementary Figures and Tables:**

**Figure Legends:**

**Figure S1: Incremental AUC by adding 1 more day of post-anticoagulant D-dimer measurements among a subset of 687 patients that have 7 day observation time. After 3 days, the incremental AUC is marginal.**

**Figure S2: Adjusted ORs estimates and 95% CI for model including post-anticoagulant fibrinogen levels in subset of 668 patients. Post-anticoagulant D-Dimer groups remain the most critical predictors of in-hospital mortality.**

**Figure S1:**

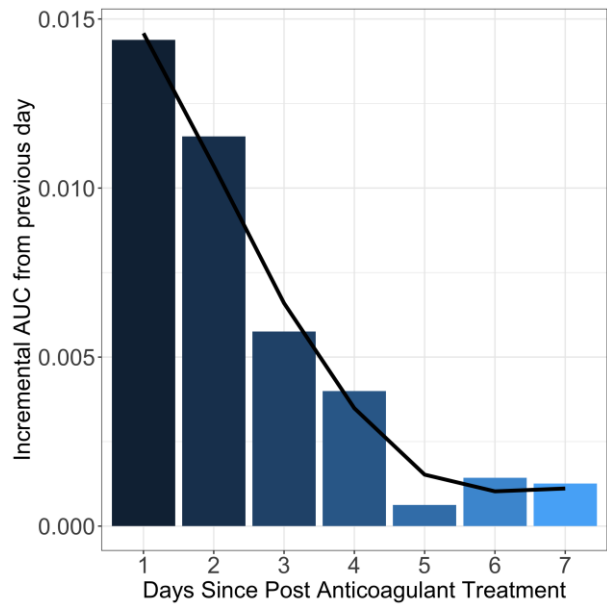

**Figure S2:**

| Variable                   | OR    | 95% CI       |
|----------------------------|-------|--------------|
| Post-A/C D-dimer HI vs. LD | 20.86 | (6.87,63.31) |
| Post-A/C D-dimer LI vs. LD | 7.8   | (2.28,26.69) |
| Post-A/C D-dimer HD vs. LD | 7.01  | (2.3,21.31)  |
| ARDS (Yes vs. No)          | 2.46  | (1.29,4.71)  |
| Age (years)                | 1.03  | (1.01,1.05)  |
| Monocyte (%)               | 0.89  | (0.82,0.96)  |

| <b>Table S1: Characteristics of Hospitalized COVID-19 Patients Stratified by Survival</b> |                                 |                             |                |
|-------------------------------------------------------------------------------------------|---------------------------------|-----------------------------|----------------|
| <b>Characteristic</b>                                                                     | <b>Discharged from Hospital</b> | <b>Deceased in Hospital</b> | <b>P-value</b> |
| N                                                                                         | 1365                            | 470                         |                |
| <b>Age in years - median [IQR]</b>                                                        | 65 [54, 75]                     | 73 [65, 83]                 | <0.001*        |
| <b>Male sex — no. (%)</b>                                                                 | 805 (59.0)                      | 262 (55.7)                  | 0.242          |
| <b>Race and ethnic group — no. (%)</b>                                                    |                                 |                             | 0.374          |
| Non-Hispanic white                                                                        | 275 (20.1)                      | 111 (23.6)                  |                |
| Non-Hispanic black                                                                        | 277 (20.3)                      | 83 (17.7)                   |                |
| Hispanic                                                                                  | 404 (29.6)                      | 138 (29.4)                  |                |
| Other                                                                                     | 236 (17.3)                      | 73 (15.5)                   |                |
| Missing data                                                                              | 173 (12.7)                      | 65 (13.8)                   |                |
| <b>Smoking status — no. (%)</b>                                                           |                                 |                             | 0.714          |
| Never smoker                                                                              | 688 (50.4)                      | 229 (48.7)                  |                |
| Ever smoker                                                                               | 384 (28.1)                      | 132 (28.1)                  |                |
| Missing data                                                                              | 293 (21.5)                      | 109 (23.2)                  |                |
| <b>Baseline diagnoses — no. (%)</b>                                                       |                                 |                             |                |
| Asthma                                                                                    | 88 (6.4)                        | 26 (5.5)                    | 0.55           |
| Chronic obstructive pulmonary disease                                                     | 62 (4.5)                        | 30 (6.4)                    | 0.146          |
| Hypertension                                                                              | 489 (35.8)                      | 211 (44.9)                  | 0.001*         |
| Obstructive sleep apnea                                                                   | 31 (2.3)                        | 8 (1.7)                     | 0.581          |
| Obesity                                                                                   | 115 (8.4)                       | 38 (8.1)                    | 0.894          |
| Diabetes                                                                                  | 348 (25.5)                      | 117 (24.9)                  | 0.844          |
| Chronic kidney disease                                                                    | 161 (11.8)                      | 68 (14.5)                   | 0.152          |
| HIV                                                                                       | 24 (1.8)                        | 7 (1.5)                     | 0.855          |
| Cancer                                                                                    | 110 (8.1)                       | 45 (9.6)                    | 0.356          |
| Coronary artery disease                                                                   | 162 (11.9)                      | 84 (17.9)                   | 0.001          |
| Atrial fibrillation                                                                       | 84 (6.2)                        | 50 (10.6)                   | 0.002          |

|                                                                                      |                        |                        |         |
|--------------------------------------------------------------------------------------|------------------------|------------------------|---------|
| Heart failure                                                                        | 86 (6.3)               | 35 (7.4)               | 0.45    |
| Chronic viral hepatitis                                                              | 21 (1.5)               | 2 (0.4)                | 0.103   |
| Alcoholic nonalcoholic liver disease                                                 | 28 (2.1)               | 8 (1.7)                | 0.781   |
| Acute respiratory distress syndrome                                                  | 107 (7.8)              | 110 (23.4)             | <0.001* |
| Acute kidney injury                                                                  | 260 (19.0)             | 205 (43.6)             | <0.001* |
| Cerebral infarction                                                                  | 61 (4.5)               | 26 (5.5)               | 0.418   |
| Intracerebral hemorrhage                                                             | 5 (0.4)                | 2 (0.4)                | 1       |
| <b>BMI (kg/m<sup>2</sup>) - median [IQR]</b>                                         | 27.55 [23.88, 32.12]   | 27.46 [24.32, 32.48]   | 0.331   |
| <b>Initial vital signs — median [IQR]</b>                                            |                        |                        |         |
| Systolic blood pressure maximum — mm Hg                                              | 143 [129, 159]         | 144 [129, 161]         | 0.531   |
| Diastolic blood pressure maximum — mm Hg                                             | 83 [76, 92]            | 81 [73, 91]            | 0.017   |
| Heart rate maximum — beats/min                                                       | 101.00 [90.75, 114.00] | 103.00 [91.00, 120.75] | 0.009   |
| Respiratory rate maximum — breaths/min                                               | 22 [20, 28]            | 24 [20, 30]            | <0.001* |
| Temperature max — fahrenheit                                                         | 99.80 [98.60, 101.30]  | 99.60 [98.60, 101.10]  | 0.064   |
| Oxygen saturation minimum — %                                                        | 93 [90, 95]            | 90 [84, 94]            | <0.001* |
| <b>Days from encounter to first therapeutic dose of anticoagulant — median [IQR]</b> | 0.55 [0.20, 1.68]      | 0.67 [0.24, 2.13]      | 0.017   |
| <b>Laboratory tests — median [IQR]</b>                                               |                        |                        |         |
| Baseline D-dimer (ug/mL)                                                             | 1.37 [0.79, 2.46]      | 1.76 [1.08, 2.92]      | <0.001* |

|                                         |                         |                         |         |
|-----------------------------------------|-------------------------|-------------------------|---------|
| Platelet (x10E3/uL)                     | 221.00 [167.00, 293.00] | 187.00 [147.00, 244.00] | <0.001* |
| Mean platelet volume mpv (FL)           | 8.40 [7.70, 9.20]       | 8.70 [7.90, 9.53]       | 0.002   |
| Red blood cell (RBC) count (x10E6/uL)   | 4.27 [3.79, 4.76]       | 4.36 [3.77, 4.75]       | 0.564   |
| While blood cell (WBC) count (x10E3/uL) | 7.60 [5.50, 10.40]      | 8.14 [5.90, 12.28]      | 0.011   |
| Lymphocyte % (%)                        | 13.05 [8.30, 18.58]     | 11.00 [7.25, 16.95]     | 0.003   |
| Lymphocyte no. (x10E3/uL)               | 1.00 [0.70, 1.30]       | 0.90 [0.60, 1.30]       | 0.024   |
| Neutrophil % (%)                        | 78.60 [70.45, 84.77]    | 81.90 [73.40, 87.10]    | <0.001* |
| Neutrophil no. (x10E3/uL)               | 5.90 [3.90, 8.71]       | 6.65 [4.50, 10.53]      | 0.002   |
| Monocyte % (%)                          | 6.40 [4.30, 9.10]       | 5.10 [3.30, 8.70]       | <0.001* |
| Monocyte no. (x10E3/uL)                 | 0.50 [0.30, 0.70]       | 0.40 [0.30, 0.70]       | 0.012   |
| Basophil % (%)                          | 0.20 [0.10, 0.40]       | 0.10 [0.00, 0.30]       | <0.001* |
| Basophil no. (x10e3/uL)                 | 0.00 [0.00, 0.00]       | 0.00 [0.00, 0.00]       | 0.104   |
| Eosinophil % (%)                        | 0.20 [0.00, 0.70]       | 0.10 [0.10, 0.30]       | 0.018   |
| Eosinophil no. (x10E3/uL)               | 0.00 [0.00, 0.00]       | 0.00 [0.00, 0.00]       | 0.002   |
| Mean corpuscular hemoglobin (MCH)       | 29.90 [28.30,           | 29.90                   | 0.806   |

|                                                                          |                          |                         |         |
|--------------------------------------------------------------------------|--------------------------|-------------------------|---------|
| (pg)                                                                     | 31.10]                   | [28.10, 31.40]          |         |
| Mean corpuscular hemoglobin concentration (MCHC) (g/dL)                  | 32.90 [32.10, 33.60]     | 32.65 [31.80, 33.40]    | 0.011   |
| Mean corpuscular volume (MCV) (fL)                                       | 90.40 [86.50, 93.80]     | 91.15 [86.82, 94.90]    | 0.074   |
| Serum creatinine (mg/dL)                                                 | 0.95 [0.73, 1.41]        | 1.20 [0.82, 2.00]       | <0.001* |
| C-reactive protein (mg/L)                                                | 113.50 [53.70, 194.30]   | 159.10 [90.82, 235.70]  | <0.001* |
| Estimated glomerular filtration rate (EGFR) (ml/min/1.73m <sup>2</sup> ) | 54.00 [30.15, 77.00]     | 41.28 [26.00, 58.33]    | <0.001* |
| Blood urea nitrogen (BUN) (mg/dL)                                        | 18.00 [12.00, 31.00]     | 26.00 [15.25, 47.75]    | <0.001* |
| Alanine aminotransferase (ALT) (u/L)                                     | 30.00 [19.00, 50.00]     | 30.00 [20.25, 50.75]    | 0.885   |
| aspartate aminotransferase (AST) (U/L)                                   | 40.00 [27.00, 63.50]     | 48.00 [33.00, 71.75]    | <0.001* |
| Total bilirubin (mg/dL)                                                  | 0.60 [0.40, 0.80]        | 0.50 [0.40, 0.80]       | 0.356   |
| Glucose (mg/dL)                                                          | 116.50 [97.00, 164.75]   | 133.00 [105.00, 186.50] | <0.001* |
| Lactate dehydrogenase (LDH) (U/L)                                        | 412.00 [312.00, 528.50]  | 516.50 [381.25, 660.75] | <0.001* |
| Hemoglobin (g/dL)                                                        | 12.70 [11.10, 13.90]     | 12.90 [11.10, 14.10]    | 0.448   |
| Ferritin (ng/mL)                                                         | 697.00 [330.00, 1512.00] | 1038.00 [480.00, ]      | <0.001* |

|                                |                         |                         |         |
|--------------------------------|-------------------------|-------------------------|---------|
|                                |                         | 2092.00]                |         |
| Calcium (mg/dL)                | 8.30 [7.90, 8.70]       | 8.20 [7.70, 8.60]       | 0.001   |
| Albumin (g/dL)                 | 3.00 [2.70, 3.40]       | 2.90 [2.60, 3.20]       | 0.001   |
| Sodium (MEQ/L)                 | 138.00 [135.00, 140.00] | 137.50 [134.00, 144.00] | 0.102   |
| Potassium (mmol/L)             | 4.20 [3.70, 4.60]       | 4.30 [3.83, 4.88]       | 0.002   |
| Chloride (mEq/L)               | 103.00 [99.00, 106.00]  | 104.00 [100.00, 108.00] | <0.001* |
| Anion gap (mEq/L)              | 11.90 [10.00, 14.00]    | 12.20 [10.20, 15.00]    | 0.002   |
| <b>Post A/C D-dimer values</b> |                         |                         |         |
| Mean D-dimer (ug/ml)           | 1.69 [0.86, 3.41]       | 3.71 [1.98, 8.05]       | <0.001* |
| Trend D-dimer (ug/ml per day)  | -0.05 [-0.21, 0.04]     | 0.09 [-0.12, 0.60]      | <0.001* |

**Table S2: Characteristics of Hospitalized COVID-19 Patients Stratified by post-anticoagulant D-dimer groups**

| <b>Characteristic</b>                  | <b>Patients with high and increasing D-dimer</b> | <b>Patients with high and decreasing D-dimer</b> | <b>Patients with low and increasing D-dimer</b> | <b>Patients with low and decreasing D-dimer</b> | <b>P-value for Independence</b> | <b>P-value for high vs low groups</b> | <b>P-value for Increasing vs decreasing in high group</b> | <b>P-value for Increasing vs decreasing in low group</b> |
|----------------------------------------|--------------------------------------------------|--------------------------------------------------|-------------------------------------------------|-------------------------------------------------|---------------------------------|---------------------------------------|-----------------------------------------------------------|----------------------------------------------------------|
| <b>N</b>                               | 430                                              | 508                                              | 337                                             | 560                                             |                                 |                                       |                                                           |                                                          |
| <b>In-hospital mortality — no. (%)</b> | 212 (49.3)                                       | 137 (27.0)                                       | 70 (20.8)                                       | 51 (9.1)                                        |                                 |                                       |                                                           |                                                          |
| <b>Age in years - median [IQR]</b>     | 70 [61, 80]                                      | 70.00 [61.00, 79.00]                             | 63.00 [53.00, 74.00]                            | 64.00 [54.00, 74.25]                            | <0.001                          | <0.001                                | 0.293                                                     | 0.609                                                    |
| <b>Male sex — no. (%)</b>              | 253 (58.8)                                       | 311 (61.2)                                       | 204 (60.5)                                      | 299 (53.4)                                      | 0.045                           | 0.087                                 | 0.499                                                     | 0.044                                                    |
| <b>Race and ethnic group — no. (%)</b> |                                                  |                                                  |                                                 |                                                 |                                 | 0.303                                 | 0.882                                                     | 0.122                                                    |
| Non-Hispanic white                     | 89 (20.7)                                        | 103 (20.3)                                       | 67 (19.9)                                       | 127 (22.7)                                      |                                 |                                       |                                                           |                                                          |
| Non-Hispanic black                     | 89 (20.7)                                        | 113 (22.2)                                       | 74 (22.0)                                       | 84 (15.0)                                       |                                 |                                       |                                                           |                                                          |
| Hispanic                               | 126 (29.3)                                       | 143 (28.1)                                       | 100 (29.7)                                      | 173 (30.9)                                      |                                 |                                       |                                                           |                                                          |
| Other                                  | 66 (15.3)                                        | 86 (16.9)                                        | 56 (16.6)                                       | 101 (18.0)                                      |                                 |                                       |                                                           |                                                          |
| Missing data                           | 60 (14.0)                                        | 63 (12.4)                                        | 40 (11.9)                                       | 75 (13.4)                                       |                                 |                                       |                                                           |                                                          |
| <b>Smoking status — no. (%)</b>        |                                                  |                                                  |                                                 |                                                 |                                 | 0.832                                 | 0.472                                                     | 0.79                                                     |



|                                               |               |            |               |            |        |        |       |       |
|-----------------------------------------------|---------------|------------|---------------|------------|--------|--------|-------|-------|
| Never smoker                                  | 208<br>(48.4) | 264 (52.0) | 171<br>(50.7) | 274 (48.9) |        |        |       |       |
| Ever smoker                                   | 120<br>(27.9) | 138 (27.2) | 97<br>(28.8)  | 161 (28.7) |        |        |       |       |
| Missing data                                  | 102<br>(23.7) | 106 (20.9) | 69<br>(20.5)  | 125 (22.3) |        |        |       |       |
| <b>No of baseline comorbidities — no. (%)</b> |               |            |               |            | <0.001 | <0.001 | 0.456 | 0.355 |
| 0                                             | 88 (20.5)     | 121 (23.8) | 121<br>(35.9) | 215 (38.4) |        |        |       |       |
| 1-2                                           | 193<br>(44.9) | 215 (42.3) | 117 (34.7)    | 205 (36.6) |        |        |       |       |
| 3+                                            | 149<br>(34.7) | 172 (33.9) | 99 (29.4)     | 140 (25)   |        |        |       |       |
| <b>Baseline diagnoses — no. (%)</b>           |               |            |               |            |        |        |       |       |
| Asthma                                        | 20 (4.7)      | 23 (4.5)   | 30 (8.9)      | 41 (7.3)   | 0.022  | 0.004  | 1     | 0.471 |
| Chronic obstructive pulmonary disease         | 28 (6.5)      | 18 (3.5)   | 22 (6.5)      | 24 (4.3)   | 0.087  | 0.91   | 0.052 | 0.187 |
| Hypertension                                  | 179<br>(41.6) | 211 (41.5) | 114<br>(33.8) | 196 (35.0) | 0.021  | 0.002  | 1     | 0.776 |
| Obstructive sleep apnea                       | 10 (2.3)      | 7 (1.4)    | 7 (2.1)       | 15 (2.7)   | 0.517  | 0.43   | 0.402 | 0.733 |
| Obesity                                       | 37 (8.6)      | 30 (5.9)   | 36<br>(10.7)  | 50 (8.9)   | 0.084  | 0.07   | 0.141 | 0.455 |
| Diabetes                                      | 112<br>(26.0) | 140 (27.6) | 79<br>(23.4)  | 134 (23.9) | 0.446  | 0.138  | 0.655 | 0.932 |

|                                              |                               |                               |                               |                               |        |        |       |       |
|----------------------------------------------|-------------------------------|-------------------------------|-------------------------------|-------------------------------|--------|--------|-------|-------|
| Chronic kidney disease                       | 62<br>(14.4)                  | 79 (15.6)                     | 36<br>(10.7)                  | 52 (9.3)                      | 0.007  | 0.001  | 0.695 | 0.572 |
| HIV                                          | 6 (1.4)                       | 12 (2.4)                      | 4 (1.2)                       | 9 (1.6)                       | 0.543  | 0.549  | 0.403 | 0.825 |
| Cancer                                       | 32 (7.4)                      | 48 (9.4)                      | 26 (7.7)                      | 49 (8.8)                      | 0.677  | 0.964  | 0.327 | 0.676 |
| Coronary artery disease                      | 58<br>(13.5)                  | 73 (14.4)                     | 48<br>(14.2)                  | 67 (12.0)                     | 0.656  | 0.515  | 0.769 | 0.376 |
| Atrial fibrillation                          | 35 (8.1)                      | 33 (6.5)                      | 29 (8.6)                      | 37 (6.6)                      | 0.536  | 1      | 0.4   | 0.328 |
| Heart failure                                | 33 (7.7)                      | 27 (5.3)                      | 26 (7.7)                      | 35 (6.2)                      | 0.398  | 0.799  | 0.181 | 0.479 |
| Chronic viral hepatitis                      | 3 (0.7)                       | 7 (1.4)                       | 4 (1.2)                       | 9 (1.6)                       | 0.634  | 0.598  | 0.489 | 0.825 |
| Alcoholic nonalcoholic liver disease         | 6 (1.4)                       | 8 (1.6)                       | 10 (3.0)                      | 12 (2.1)                      | 0.395  | 0.189  | 1     | 0.582 |
| Acute respiratory distress syndrome          | 94<br>(21.9)                  | 73 (14.4)                     | 24 (7.1)                      | 26 (4.6)                      | <0.001 | <0.001 | 0.004 | 0.157 |
| Acute kidney injury                          | 167<br>(38.8)                 | 167 (32.9)                    | 58<br>(17.2)                  | 73 (13.0)                     | <0.001 | <0.001 | 0.067 | 0.106 |
| Cerebral infarction                          | 17 (4.0)                      | 31 (6.1)                      | 18 (5.3)                      | 21 (3.8)                      | 0.245  | 0.506  | 0.18  | 0.336 |
| Intracerebral hemorrhage                     | 2 (0.5)                       | 1 (0.2)                       | 2 (0.6)                       | 2 (0.4)                       | 0.815  | 0.953  | 0.885 | 1     |
| <b>BMI (kg/m<sup>2</sup>) - median [IQR]</b> | 27.46<br>[23.86,<br>32.79]    | 26.46<br>[23.04,<br>31.06]    | 28.13<br>[24.48,<br>32.53]    | 27.90<br>[24.58,<br>32.54]    | <0.001 | 0.001  | 0.003 | 0.621 |
| <b>Initial vital signs — median [IQR]</b>    |                               |                               |                               |                               |        |        |       |       |
| Systolic blood pressure maximum — mm Hg      | 146.00<br>[131.25,<br>163.75] | 145.00<br>[131.00,<br>163.00] | 140.00<br>[127.00,<br>156.00] | 141.00<br>[127.00,<br>156.00] | <0.001 | <0.001 | 0.748 | 0.944 |

|                                                                                      |                            |                            |                            |                            |        |        |        |        |
|--------------------------------------------------------------------------------------|----------------------------|----------------------------|----------------------------|----------------------------|--------|--------|--------|--------|
| Diastolic blood pressure maximum — mm Hg                                             | 82.50<br>[74.00, 92.00]    | 84.00<br>[76.00, 93.00]    | 82.00<br>[75.00, 90.00]    | 82.00<br>[74.00, 90.00]    | 0.021  | 0.01   | 0.135  | 0.516  |
| Heart rate maximum — beats/min                                                       | 102.00<br>[89.00, 118.00]  | 104.00<br>[92.00, 117.00]  | 102.00<br>[91.00, 114.00]  | 100.00<br>[90.00, 113.00]  | 0.063  | 0.022  | 0.236  | 0.437  |
| Respiratory rate maximum — breaths/min                                               | 22.00<br>[20.00, 30.00]    | 22.00<br>[20.00, 30.00]    | 21.00<br>[20.00, 26.00]    | 21.50<br>[20.00, 26.00]    | <0.001 | <0.001 | 0.796  | 0.393  |
| Temperature max — fahrenheit                                                         | 99.70<br>[98.60, 101.20]   | 99.50<br>[98.60, 100.80]   | 100.00<br>[98.80, 101.70]  | 99.90<br>[98.70, 101.30]   | <0.001 | <0.001 | 0.054  | 0.132  |
| Oxygen saturation minimum — %                                                        | 91.00<br>[87.00, 94.00]    | 92.00<br>[87.00, 95.00]    | 93.00<br>[90.00, 95.00]    | 93.00<br>[90.00, 95.00]    | <0.001 | <0.001 | 0.163  | 0.059  |
| <b>Time from encounter to first therapeutic dose of anticoagulant — median [IQR]</b> | 0.71<br>[0.24, 2.57]       | 0.68 [0.22, 1.96]          | 0.54<br>[0.21, 1.71]       | 0.49 [0.18, 1.41]          | 0.001  | <0.001 | 0.426  | 0.163  |
| <b>Initial laboratory tests — median [IQR]</b>                                       |                            |                            |                            |                            |        |        |        |        |
| D-dimer (ug/mL FEU)                                                                  | 2.10<br>[1.30, 3.23]       | 3.35 [2.05, 7.14]          | 0.87<br>[0.54, 1.28]       | 1.11 [0.72, 1.58]          | <0.001 | <0.001 | <0.001 | <0.001 |
| Platelet (x10E3/uL)                                                                  | 203.00<br>[163.00, 282.00] | 226.00<br>[163.00, 290.50] | 194.00<br>[150.00, 256.00] | 216.00<br>[159.00, 285.50] | 0.038  | 0.119  | 0.191  | 0.036  |
| Mean platelet volume mpv (fL)                                                        | 8.50<br>[7.80, 9.40]       | 8.60 [7.70, 9.50]          | 8.40<br>[7.70, 9.20]       | 8.40 [7.70, 9.20]          | 0.613  | 0.195  | 0.724  | 0.9    |

|                            |                      |                      |                      |                      |        |        |       |       |
|----------------------------|----------------------|----------------------|----------------------|----------------------|--------|--------|-------|-------|
| RBC count (x10E6/uL)       | 4.25 [3.69, 4.72]    | 4.13 [3.56, 4.69]    | 4.39 [3.98, 4.79]    | 4.33 [3.96, 4.80]    | <0.001 | <0.001 | 0.247 | 0.623 |
| WBC count (x10E3/uL)       | 8.20 [5.90, 12.20]   | 8.85 [6.20, 11.88]   | 6.60 [4.84, 8.80]    | 7.15 [5.20, 10.10]   | <0.001 | <0.001 | 0.257 | 0.115 |
| Lymphocyte % (%)           | 11.80 [7.50, 17.20]  | 9.90 [6.55, 16.80]   | 14.10 [9.60, 20.10]  | 13.95 [9.12, 20.65]  | <0.001 | <0.001 | 0.049 | 0.908 |
| Lymphocyte no. (x10E3/uL)  | 0.90 [0.70, 1.30]    | 0.90 [0.60, 1.30]    | 0.90 [0.70, 1.30]    | 0.90 [0.70, 1.30]    | 0.425  | 0.108  | 0.715 | 0.785 |
| Neutrophil % (%)           | 80.80 [72.62, 86.80] | 81.85 [74.30, 87.00] | 77.00 [69.60, 83.50] | 77.10 [68.93, 84.18] | <0.001 | <0.001 | 0.241 | 0.788 |
| Neutrophil no. (x10E3/uL)  | 6.50 [4.25, 10.15]   | 7.35 [4.90, 10.45]   | 5.06 [3.50, 7.40]    | 5.40 [3.70, 7.80]    | <0.001 | <0.001 | 0.062 | 0.184 |
| Monocyte no. (x10E3/uL)    | 0.50 [0.30, 0.70]    | 0.50 [0.30, 0.70]    | 0.50 [0.30, 0.70]    | 0.40 [0.30, 0.60]    | 0.045  | 0.04   | 0.67  | 0.048 |
| Monocyte % (%)             | 6.05 [3.68, 9.23]    | 5.60 [4.00, 8.20]    | 6.60 [4.80, 9.60]    | 6.30 [4.00, 9.07]    | 0.011  | 0.01   | 0.225 | 0.114 |
| Basophil number (x10e3/uL) | 0.00 [0.00, 0.00]    | 0.00 [0.00, 0.00]    | 0.00 [0.00, 0.00]    | 0.00 [0.00, 0.00]    | 0.192  | 0.253  | 0.078 | 0.797 |
| Basophil percent (%)       | 0.10 [0.10, 0.30]    | 0.20 [0.10, 0.40]    | 0.20 [0.10, 0.40]    | 0.20 [0.10, 0.40]    | 0.006  | 0.001  | 0.147 | 0.861 |
| Eosinophil no. (x10E3/uL)  | 0.00 [0.00, 0.00]    | 0.00 [0.00, 0.10]    | 0.00 [0.00, 0.00]    | 0.00 [0.00, 0.00]    | 0.04   | 0.044  | 0.061 | 0.439 |
| Eosinophil % (%)           | 0.20 [0.10, 0.40]    | 0.20 [0.00, 0.70]    | 0.10 [0.00, 0.50]    | 0.20 [0.00, 0.50]    | 0.198  | 0.132  | 0.123 | 0.646 |
| MCH (pg)                   | 29.80 [27.80, 30.20] | 30.20 [28.30, 29.50] | 29.50 [28.10, 29.90] | 29.90 [28.40, 29.80] | 0.263  | 0.816  | 0.225 | 0.111 |

|                                                                          |                              |                              |                             |                              |        |        |       |       |
|--------------------------------------------------------------------------|------------------------------|------------------------------|-----------------------------|------------------------------|--------|--------|-------|-------|
|                                                                          | 31.10]                       | 31.20]                       | 30.90]                      | 31.10]                       |        |        |       |       |
| MCHC (g/dL)                                                              | 32.60<br>[32.00,<br>33.40]   | 32.70<br>[31.70,<br>33.50]   | 33.00<br>[32.10,<br>33.60]  | 33.00<br>[32.30,<br>33.60]   | 0.002  | <0.001 | 0.694 | 0.677 |
| MCV (FL)                                                                 | 90.40<br>[86.60,<br>94.70]   | 91.30<br>[86.95,<br>95.40]   | 89.80<br>[86.40,<br>92.40]  | 90.70<br>[86.85,<br>93.93]   | 0.018  | 0.027  | 0.2   | 0.056 |
| Serum creatinine (mg/dL)                                                 | 1.11<br>[0.83, 2.00]         | 1.14 [0.81,<br>2.02]         | 0.89<br>[0.70, 1.21]        | 0.87 [0.71,<br>1.20]         | <0.001 | <0.001 | 0.966 | 0.706 |
| C-reactive protein (mg/L)                                                | 137.30<br>[79.03,<br>226.30] | 167.82<br>[81.00,<br>235.15] | 96.70<br>[50.52,<br>159.38] | 108.35<br>[48.55,<br>190.49] | <0.001 | <0.001 | 0.17  | 0.35  |
| Estimated glomerular filtration rate (EGFR) (ml/min/1.73m <sup>2</sup> ) | 45.00<br>[24.75,<br>62.00]   | 46.00<br>[20.34,<br>64.00]   | 58.19<br>[32.75,<br>91.00]  | 56.14<br>[39.09,<br>76.50]   | <0.001 | <0.001 | 0.996 | 0.73  |
| Blood urea nitrogen (BUN) (mg/dL)                                        | 23.00<br>[14.00,<br>43.00]   | 24.00<br>[15.00,<br>45.00]   | 16.00<br>[11.00,<br>26.00]  | 16.00<br>[11.00,<br>26.00]   | <0.001 | <0.001 | 0.343 | 0.904 |
| Alanine aminotransferase (ALT) (u/L)                                     | 31.00<br>[19.00,<br>51.00]   | 30.00<br>[20.00,<br>50.00]   | 27.00<br>[19.00,<br>48.00]  | 32.00<br>[19.00,<br>50.00]   | 0.615  | 0.852  | 0.918 | 0.187 |
| aspartate aminotransferase (AST) (U/L)                                   | 43.00<br>[30.00,<br>70.00]   | 43.00<br>[29.00,<br>69.50]   | 39.00<br>[27.00,<br>58.00]  | 42.00<br>[28.00,<br>63.00]   | 0.276  | 0.066  | 0.95  | 0.474 |
| Total bilirubin (mg/dL)                                                  | 0.60<br>[0.40, 0.80]         | 0.60 [0.40,<br>0.83]         | 0.50<br>[0.40, 0.80]        | 0.50 [0.40,<br>0.80]         | 0.076  | 0.015  | 0.352 | 0.641 |
| Anion gap (mEq/L)                                                        | 12.00<br>[10.00,<br>14.50]   | 12.50<br>[10.00,<br>15.00]   | 11.70<br>[10.00,<br>13.55]  | 11.30<br>[9.60,<br>13.00]    | <0.001 | <0.001 | 0.395 | 0.077 |

|                                         |                                |                                |                                |                                |        |        |       |       |
|-----------------------------------------|--------------------------------|--------------------------------|--------------------------------|--------------------------------|--------|--------|-------|-------|
| Albumin (g/dL)                          | 3.00<br>[2.60, 3.30]           | 2.80 [2.50,<br>3.20]           | 3.10<br>[2.90, 3.50]           | 3.10 [2.80,<br>3.40]           | <0.001 | <0.001 | 0.009 | 0.093 |
| Calcium (mg/dL)                         | 8.30<br>[7.90, 8.70]           | 8.20 [7.70,<br>8.70]           | 8.20<br>[7.90, 8.70]           | 8.30 [8.00,<br>8.70]           | 0.011  | 0.013  | 0.067 | 0.183 |
| Chloride<br>(mEq/L)                     | 104.00<br>[100.00,<br>107.00]  | 103.00<br>[99.00,<br>108.00]   | 103.00<br>[99.00,<br>106.00]   | 103.00<br>[99.00,<br>107.00]   | 0.007  | 0.001  | 0.413 | 0.59  |
| Ferritin (ng/mL)                        | 888.00<br>[399.50,<br>2137.50] | 909.50<br>[476.25,<br>1947.75] | 697.00<br>[308.00,<br>1768.00] | 638.50<br>[299.50,<br>1239.50] | <0.001 | <0.001 | 0.805 | 0.546 |
| Glucose (mg/dL)                         | 130.00<br>[100.00,<br>181.50]  | 128.00<br>[99.25,<br>184.00]   | 114.00<br>[96.00,<br>157.00]   | 115.00<br>[97.00,<br>152.50]   | <0.001 | <0.001 | 0.938 | 0.704 |
| Hemoglobin<br>(g/dL)                    | 12.35<br>[10.70,<br>14.00]     | 12.50<br>[10.55,<br>13.80]     | 12.90<br>[11.80,<br>14.10]     | 13.10<br>[11.80,<br>14.10]     | <0.001 | <0.001 | 0.611 | 0.59  |
| Lactate<br>dehydrogenase<br>(LDH) (U/L) | 491.00<br>[351.25,<br>626.00]  | 496.00<br>[366.25,<br>657.00]  | 379.00<br>[306.00,<br>487.00]  | 399.50<br>[304.75,<br>492.75]  | <0.001 | <0.001 | 0.279 | 0.445 |
| Potassium<br>(mmol/L)                   | 4.20<br>[3.90, 4.70]           | 4.30 [3.80,<br>4.80]           | 4.10<br>[3.70, 4.50]           | 4.10 [3.70,<br>4.50]           | <0.001 | <0.001 | 0.357 | 0.421 |
| Sodium (MEQ/L)                          | 138.00<br>[135.00,<br>141.00]  | 137.00<br>[134.00,<br>142.75]  | 138.00<br>[135.00,<br>140.00]  | 138.00<br>[135.00,<br>140.00]  | 0.443  | 0.181  | 0.38  | 0.995 |

| <b>Table S3: Unimputed Analysis</b> |     |          |          |             |            |              |
|-------------------------------------|-----|----------|----------|-------------|------------|--------------|
| term                                | OR  | OR_lower | OR_upper | p.value     | auc_change | p_bonferroni |
| Post-A/C D-dimer HI (Ref: LD)       | 8.6 | 3.3      | 22.8     | 1.49143E-05 | 0.045      | 0.000164057  |
| ARDS                                | 3.3 | 1.5      | 7.4      | 0.002982326 | 0.029      | 0.03280559   |
| Post-A/C D-dimer LI (Ref: LD)       | 3.3 | 1.1      | 9.4      | 0.027278089 | 0.014      | 0.300058977  |
| Acute Kidney Injury                 | 2.5 | 1.3      | 5.0      | 0.006749455 | 0.025      | 0.074244004  |
| Post-A/C D-dimer HD (Ref: LD)       | 1.9 | 0.7      | 5.4      | 0.209672822 | 0.018      | 1            |
| basophil_percent                    | 1.7 | 0.7      | 4.0      | 0.214340486 | 0.005      | 1            |
| Age                                 | 1.0 | 1.0      | 1.1      | 0.000761589 | 0.030      | 0.008377481  |
| sodium                              | 1.0 | 1.0      | 1.1      | 0.434094472 | 0.019      | 1            |
| LDH                                 | 1.0 | 1.0      | 1.0      | 0.334443227 | 0.003      | 1            |
| Platelet                            | 1.0 | 1.0      | 1.0      | 0.000123421 | 0.046      | 0.001357635  |
| O2 Sat Min                          | 0.9 | 0.9      | 1.0      | 0.00014103  | 0.019      | 0.001551334  |
